# Supplementary material
Source: publisher site journal article supplement (https://www.dovepress.com/article/348378)
Supplement: Supplementary file 1 [file get_supplementary_file.php]

**SUPPLEMENTARY MATERIAL**

**Differential associations of the cardiac troponin T algorithms and significant coronary stenosis in renal dysfunction patients presenting with non-ST segment elevation acute coronary syndromes**

Tangpaisarn T1, Srimakam N1, Senthong V2, Phungoen P1, Kotruchin P1

*1 Department of Emergency Medicine, Faculty of Medicine Srinagarind Hospital, Khon Kaen University, Khon Kaen 40002, Thailand.*

*2 Department of Internal Medicine, Faculty of Medicine Srinagarind Hospital, Khon Kaen University, Khon Kaen 40002, Thailand.*

**Corresponding author:**

Praew Kotruchin, M.D., Ph.D.

Department of Emergency Medicine,

Faculty of Medicine Srinagarind Hospital,

Khon Kaen University, Khon Kaen 40002, Thailand

Email: [kpraew@kku.ac.th](mailto:kpraew@kku.ac.th)

Tel: +66 65 5269 422

**Methods**

**Operating definition:**

1. Non-ST segment elevation acute coronary syndromes (NSTE-ACS)

- NSTE-ACS, including unstable angina and non-ST-elevation myocardial infarction (NSTEMI), was diagnosed by intervention cardiologist on duty according to the 4th universal definition of myocardial infarction criteria.1

- Unstable angina is defined as myocardial ischemia at rest or on minimal exertion in the absence of acute cardiomyocyte injury/necrosis.2

2. Myocardial infarction (MI)

Myocardial infarction (MI) is caused by atherothrombotic coronary artery disease (CAD) and usually precipitated by atherosclerotic plaque disruption (rupture or erosion) which is designated as a type 1 MI. The relative burden of atherosclerosis and thrombosis in the culprit lesion varies greatly, and the dynamic thrombotic component may lead to distal coronary embolization resulting in myocyte necrosis. Plaque rupture may not only be complicated by intraluminal thrombosis but also by hemorrhage into the plaque through the disrupted surface.

Criteria for type 1 MI

Detection of a rise and/or fall of cardiac troponin (cTn) values with at least one value above the 99th percentile URL and with at least one of the following:

- Symptoms of acute myocardial ischemia;
- New ischemic ECG changes;
- Development of pathological Q waves;
- Imaging evidence of new loss of viable myocardium or new regional wall motion abnormality in a pattern consistent with an ischemic etiology;
- Identification of a coronary thrombus by angiography including intracoronary imaging or by autopsy.

3. Estimating glomerular filtration rate (eGFR)

Calculated by CKD-EPI creatinine equation3 as below:

“141 min (SCr/k,1)a max (SCr/k,1)1.209 0.993 Age [1.018 if female] [1.159 if black]”, where SCr is serum creatinine (in mg/dl), k is 0.7 for females and 0.9 for males, a is 0.329 for females and 0.411 for males, min is the minimum of SCr/k or 1, and max is the maximum of SCr/k or 1.

**References:**

1. Thygesen K, Alpert JS, Jaffe AS, et al. Fourth Universal Definition of Myocardial Infarction (2018). *Circulation*. 2018;138(20):e618-e651. doi:10.1161/CIR.0000000000000617

2. Collet J-P, Thiele H, Barbato E, et al. 2020 ESC Guidelines for the management of acute coronary syndromes in patients presenting without persistent ST-segment elevation. *Eur Heart J*. Published online August 29, 2020. doi:10.1093/eurheartj/ehaa575

3. Inker LA, Astor BC, Fox CH, et al. KDOQI US commentary on the 2012 KDIGO clinical practice guideline for the evaluation and management of CKD. *Am J Kidney Dis Off J Natl Kidney Found*. 2014;63(5):713-735. doi:10.1053/j.ajkd.2014.01.416
